# Supplementary material
Source: Research Square preprint supplement (doi:10.21203/rs.3.rs-9760902/v1)
Supplement: Supplementary file 1 [file 13587f13837fbba86cdab37a.docx]

Supplementary Appendix

Contents

[1. Figures 3](#_Toc218774354)

[2. Tables 5](#_Toc218774355)

[3. Abbreviation list 8](#_Toc218774356)

# Figures


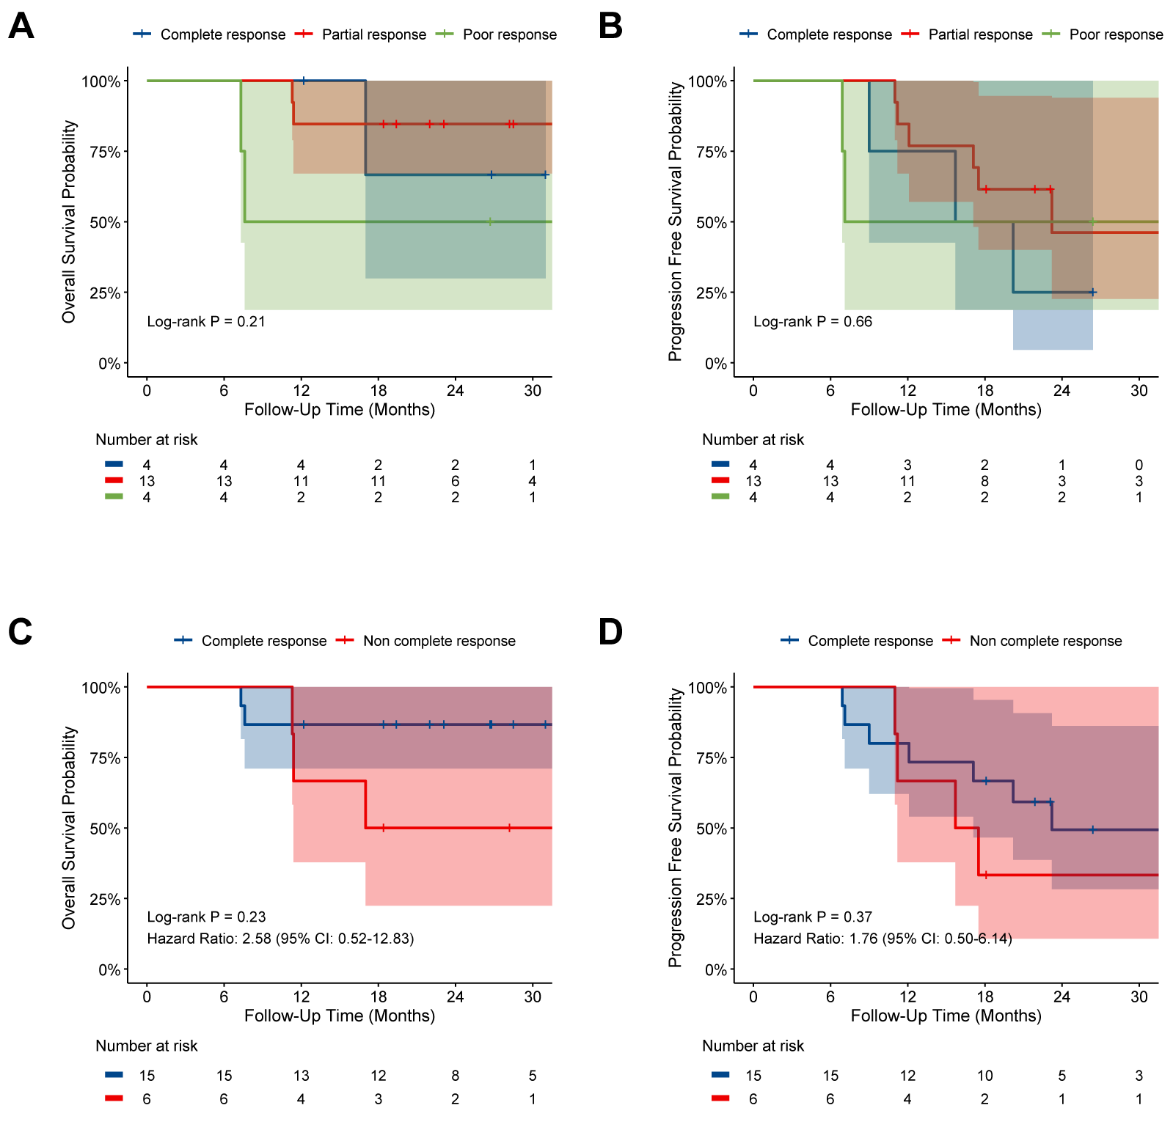


**Figure S1.** Survival outcomes by tumor response to neoadjuvant immuno-chemotherapy in patients (n=21) with synchronous primary esophageal and pharyngeal–laryngeal cancers. (A-B) Overall survival (OS) and progression-free survival (PFS) stratified according to treatment response of esophageal squamous cell carcinoma (ESCC). (C-D) OS and PFS stratified according to treatment response of synchronous primary cancers in the pharynx and larynx (SPC-PL). CI, confidence interval.


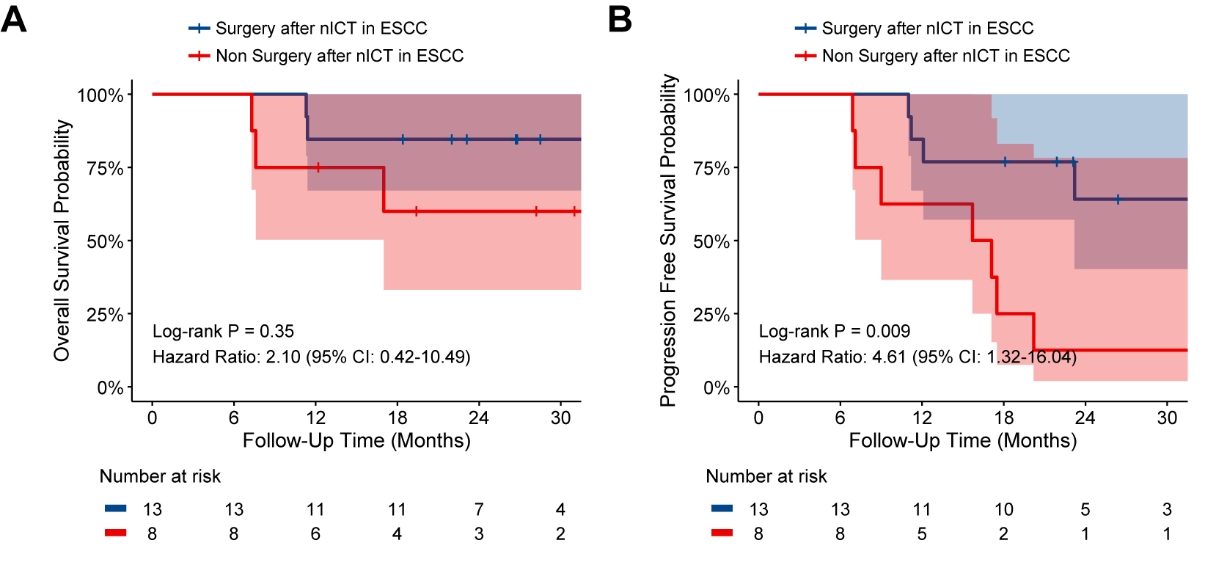


**Figure S2.** Survival outcomes stratified by surgery management following neoadjuvant immuno-chemotherapy in patients with esophageal squamous cell carcinoma (ESCC) (n=21). (A) Overall survival (OS). (B) Progression-free survival (PFS). CI, confidence interval.


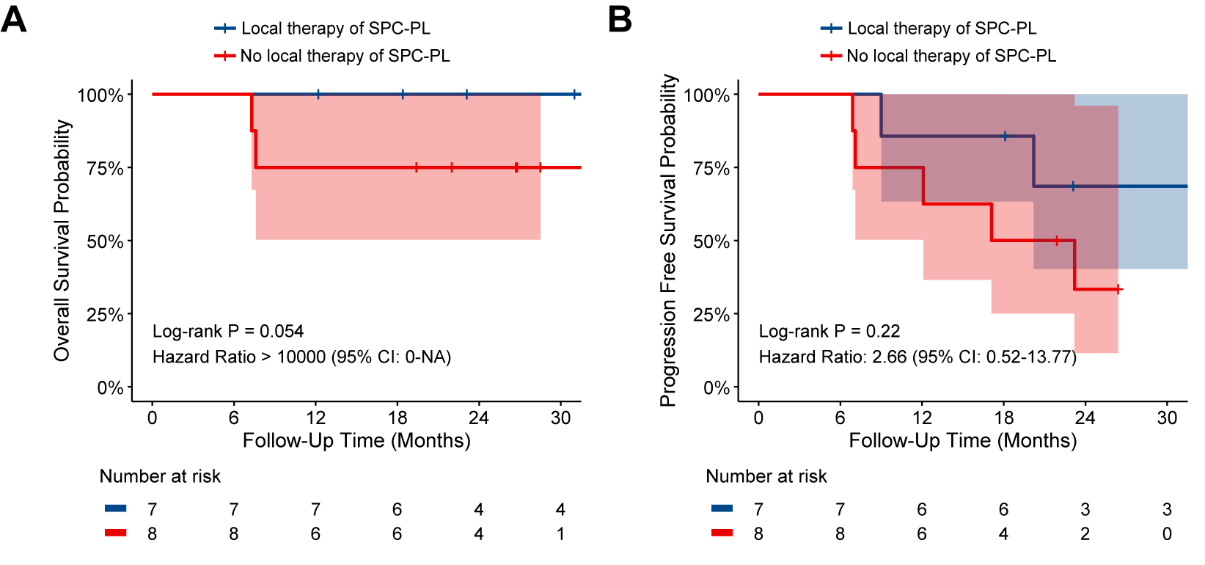


**Figure S3.** Survival outcomes by local therapy management in patients achieving clinical complete response for synchronous primary cancers in pharynx and larynx (SPC-PL) after neoadjuvant immuno-chemotherapy (n=15). (A) Overall survival (OS). (B) Progression-free survival (PFS). CI, confidence interval.


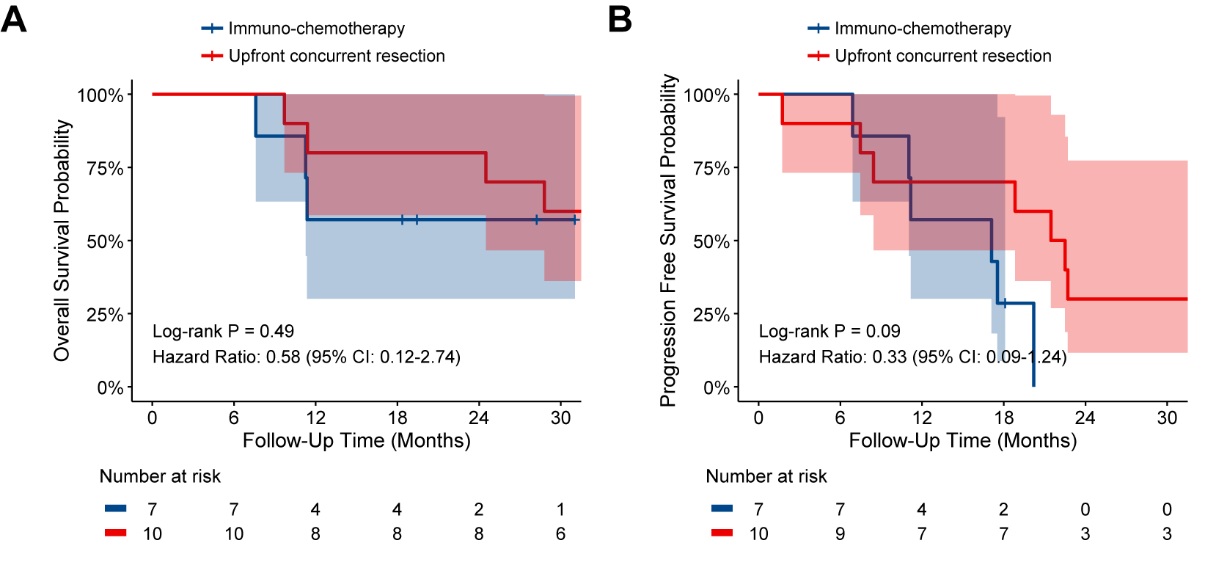


**Figure S4.** Survival outcomes according to initial treatment strategy in patients with stage cT2-3N0-2 synchronous primary esophageal and pharyngeal–laryngeal cancers. (A) Overall survival (OS). (B) Progression-free survival (PFS). Initial treatment strategies included immuno-chemotherapy and upfront concurrent resection. CI, confidence interval.

# Tables

**Table S1. Baseline characteristics of 18 patients with synchronous primary esophageal and pharyngeal–laryngeal cancers who initially underwent upfront concurrent resection.**

ESCC, esophageal squamous cell carcinoma; SPC-PL, synchronous primary cancers in pharynx and larynx.

| **Characteristic** | **N = 18** |
| --- | --- |
| **Age, Mean ± SD** | 60.6 ± 5.2 |
| **Sex, n (%)** |  |
| Male | 18 (100.0%) |
| **Race, n (%)** |  |
| Asian | 18 (100.0%) |
| **Cigarette smoking, n (%)** |  |
| No | 3 (16.7%) |
| Yes | 15 (83.3%) |
| **Alcohol drinking, n (%)** |  |
| No | 1 (5.6%) |
| Yes | 17 (94.4%) |
| **Location of ESCC, n (%)** |  |
| Upper thoracic | 2 (11.1%) |
| Middle thoracic | 6 (33.3%) |
| Lower thoracic | 10 (55.6%) |
| **Clinical TNM stage of ESCC, n (%)** |  |
| I | 3 (16.7%) |
| II | 7 (38.9%) |
| III | 8 (44.4%) |
| **Pathology of SPC-PL, n (%)** |  |
| Squamous cell carcinoma | 18 (100.0%) |
| **Location of SPC-PL, n (%)** |  |
| Larynx | 1 (5.6%) |
| Hypopharynx | 17 (94.4%) |
| Pyriform fossa | 9 (50.0%) |
| Posterior pharyngeal wall | 6 (33.3%) |
| Post-cricoid area | 2 (11.1%) |
| **Clinical TNM stage of SPC-PL, n (%)** |  |
| I | 8 (44.4%) |
| II | 3 (16.7%) |
| III | 7 (38.9%) |

**Table S2**

**Characteristics of 18 patients who underwent upfront concurrent resection.** **Local therapies were recorded for each lesion separately; (E) represents esophageal squamous cell carcinoma and (PL) represents synchronous primary cancers in pharynx and larynx.**

ESD, endoscopic submucosal dissection.

| **Patient ID** | **Treatment** | **Pathological stage of ESCC** | **Pathological stage of SPC-PL** | **Survival status** | **Progression site** | **Progression-free months** |
| --- | --- | --- | --- | --- | --- | --- |
| S1 | Surgery(E+PL) | pT3N2M0, Stage IIIB | pT1N0M0, Stage I | Non-cancer-related Death | NA | 20.5 |
| S2 | Surgery(E+PL)→Radiotherapy(E+PL)+Chemotherapy | pT1bN0M0, Stage IB | pT3N0M0, Stage III | Progression and Death | Lung; Bone | 22.7 |
| S3 | Surgery(E+PL)→Chemotherapy | pT2N2M0, Stage IIIB | pT1N1M0, Stage III | Alive without Progression | NA | 76.7 |
| S4 | Surgery(E+PL) | pT2N2M0, Stage IIIB | pT2N0M0, Stage II | Progression and Death | Thyroid; Bone; Liver | 8.4 |
| S5 | Surgery(E+PL) | pT3N1M0, Stage IIIB | pT1N0M0, Stage I | Progression and Death | Unknown | 1.7 |
| S6 | Surgery(E+PL)→Radiotherapy(E+PL)+Chemotherapy | pT2N3M0, Stage IVA | pT1N0M0, Stage I | Progression and Death | Liver | 18.8 |
| S7 | Surgery(E+PL) | pT2N0M0, Stage IIA | pT3N0M0, Stage III | Alive without Progression | NA | 62.2 |
| S8 | Surgery(E+PL)→Radiotherapy(E+PL)+Chemotherapy | pT2N2M0, Stage IIIB | pT2N1M0, Stage III | Progression and Death | Abdominal lymph nodes | 22.5 |
| S9 | Surgery(E+PL)→Chemotherapy | pT1bN1M0, Stage IIB | pT3N2M0, Stage IVA | Progression and Death | Cervical lymph nodes | 7.4 |
| S10 | Surgery(E+PL) | pT1aN0M0, Stage IA | pT1N0M0, Stage I | Alive without Progression | NA | 42.1 |
| S11 | Surgery(E+PL)→Chemotherapy | pT3N1M0, Stage IIIB | pT2N2M0, Stage IVA | Alive with Progression | Cervical lymph nodes | 21.5 |
| S12 | Surgery(E+PL)→Radiotherapy(E+PL)+Chemotherapy | pT1aN0M0, Stage IA | pT3N2M0, Stage IVA | Alive without Progression | NA | 42.1 |
| S13 | Surgery(E+PL)→Radiotherapy(E+PL)+Chemotherapy | Unknown | Unknown | Progression and Death | Lung | 21.4 |
| S14 | Surgery(E+PL)→Radiotherapy(E+PL)+Chemotherapy | pT2N1M0, Stage IIIA | pT1N1M0, Stage III | Progression and Death | Unknown | 32.2 |
| S15 | Surgery(E+PL)→Radiotherapy(E+PL)+Chemotherapy | pT2N2M0, Stage IIIB | pT3N2M0, Stage IVA | Alive without Progression | NA | 18.3 |
| S16 | Surgery(E)+ESD(PL)→Chemotherapy | pT3N2M0, Stage IIIB | pT2N0M0, Stage II | Alive without Progression | NA | 60.7 |
| S17 | Surgery(E)+ESD(PL)→Radiotherapy(E)+Chemotherapy | pT3N0M0, Stage IIA | pT2N0M0, Stage II | Alive without Progression | NA | 60.8 |
| S18 | Surgery(E+PL) | pT1aN0M0, Stage IA | pT1N0M0, Stage I | Non-cancer-related Death | NA | 59.3 |

**Table S3**

**Univariable and multivariable cox proportional hazard analysis evaluating overall survival.**

CI, confidence interval; HR, hazard ratio; ESCC, esophageal squamous cell carcinoma; SPC-PL, synchronous primary cancers in pharynx and larynx.

| **Characteristic** | **Univariable** | | | | | **Multivariable** | | | | |
| --- | --- | --- | --- | --- | --- | --- | --- | --- | --- | --- |
| **N** | **Event N** | **HR** | **95% CI** | **p-value** | **N** | **Event N** | **HR** | **95% CI** | **p-value** |
| **Initial treatment** |  |  |  |  |  |  |  |  |  |  |
| Upfront concurrent resection | 18 | 10 | — | — |  | 18 | 10 | — | — |  |
| Immuno-chemotherapy | 21 | 6 | 0.93 | 0.32, 2.68 | 0.895 | 21 | 6 | 1.29 | 0.41, 4.04 | 0.664 |
| **Age** |  |  |  |  |  |  |  |  |  |  |
| ＜60 | 17 | 9 | — | — |  |  |  |  |  |  |
| ≥60 | 22 | 7 | 0.43 | 0.15, 1.21 | 0.109 |  |  |  |  |  |
| **Cigarette smoking** |  |  |  |  |  |  |  |  |  |  |
| No | 6 | 1 | — | — |  |  |  |  |  |  |
| Yes | 33 | 15 | 4.70 | 0.61, 35.95 | 0.136 |  |  |  |  |  |
| **Alcohol drinking** |  |  |  |  |  |  |  |  |  |  |
| No | 2 | 1 | — | — |  |  |  |  |  |  |
| Yes | 37 | 15 | 0.94 | 0.12, 7.13 | 0.949 |  |  |  |  |  |
| **Eastern cooperative oncology group performance status** |  |  |  |  |  |  |  |  |  |  |
| 0 | 36 | 16 | — | — |  |  |  |  |  |  |
| 1 | 3 | 0 | 0.00 | 0.00, Inf | 0.998 |  |  |  |  |  |
| **Location of ESCC** |  |  |  |  |  |  |  |  |  |  |
| Upper thoracic | 3 | 2 | — | — |  |  |  |  |  |  |
| Middle thoracic | 12 | 5 | 0.78 | 0.15, 4.07 | 0.771 |  |  |  |  |  |
| Lower thoracic | 24 | 9 | 0.93 | 0.20, 4.41 | 0.927 |  |  |  |  |  |
| **Clinical TNM stage of ESCC** |  |  |  |  |  |  |  |  |  |  |
| I-II | 21 | 10 | — | — |  |  |  |  |  |  |
| III-IVa | 18 | 6 | 0.44 | 0.16, 1.26 | 0.125 |  |  |  |  |  |
| **Pathology of SPC-PL** |  |  |  |  |  |  |  |  |  |  |
| High-grade intraepithelial neoplasia | 2 | 2 | — | — |  |  |  |  |  |  |
| Squamous cell carcinoma | 37 | 14 | 0.31 | 0.07, 1.40 | 0.127 |  |  |  |  |  |
| **Clinical TNM stage of SPC-PL** |  |  |  |  |  |  |  |  |  |  |
| 0-II | 27 | 9 | — | — |  | 27 | 9 | — | — |  |
| III-IVa | 12 | 7 | 2.60 | 0.93, 7.22 | 0.067 | 12 | 7 | 2.82 | 0.94, 8.44 | 0.063 |
|  | | | | | | | | | | |

**Table S4**

**Univariable and multivariable cox proportional hazard analysis evaluating progression-free survival.**

CI, confidence interval; HR, hazard ratio; ESCC, esophageal squamous cell carcinoma; SPC-PL, synchronous primary cancers in pharynx and larynx.

| **Characteristic** | **Univariable** | | | | | **Multivariable** | | | | |
| --- | --- | --- | --- | --- | --- | --- | --- | --- | --- | --- |
| **N** | **Event N** | **HR** | **95% CI** | **p-value** | **N** | **Event N** | **HR** | **95% CI** | **p-value** |
| **Initial treatment** |  |  |  |  |  |  |  |  |  |  |
| Upfront concurrent resection | 18 | 12 | — | — |  | 18 | 12 | — | — |  |
| Immuno-chemotherapy | 21 | 11 | 1.22 | 0.52, 2.91 | 0.646 | 21 | 11 | 1.95 | 0.74, 5.14 | 0.178 |
| **Age** |  |  |  |  |  |  |  |  |  |  |
| ＜60 | 17 | 10 | — | — |  |  |  |  |  |  |
| ≥60 | 22 | 13 | 0.75 | 0.32, 1.78 | 0.520 |  |  |  |  |  |
| **Cigarette smoking** |  |  |  |  |  |  |  |  |  |  |
| No | 6 | 1 | — | — |  |  |  |  |  |  |
| Yes | 33 | 22 | 7.00 | 0.94, 52.31 | 0.058 |  |  |  |  |  |
| **Alcohol drinking** |  |  |  |  |  |  |  |  |  |  |
| No | 2 | 1 | — | — |  |  |  |  |  |  |
| Yes | 37 | 22 | 0.85 | 0.11, 6.34 | 0.871 |  |  |  |  |  |
| **Eastern cooperative oncology group performance status** |  |  |  |  |  |  |  |  |  |  |
| 0 | 36 | 22 | — | — |  |  |  |  |  |  |
| 1 | 3 | 1 | 0.47 | 0.06, 3.58 | 0.465 |  |  |  |  |  |
| **Location of ESCC** |  |  |  |  |  |  |  |  |  |  |
| Upper thoracic | 3 | 2 | — | — |  |  |  |  |  |  |
| Middle thoracic | 12 | 7 | 1.05 | 0.22, 5.13 | 0.947 |  |  |  |  |  |
| Lower thoracic | 24 | 14 | 1.07 | 0.24, 4.73 | 0.933 |  |  |  |  |  |
| **Clinical TNM stage of ESCC** |  |  |  |  |  |  |  |  |  |  |
| I-II | 21 | 14 | — | — |  |  |  |  |  |  |
| III-IVa | 18 | 9 | 0.49 | 0.20, 1.18 | 0.110 |  |  |  |  |  |
| **Pathology of SPC-PL** |  |  |  |  |  |  |  |  |  |  |
| High-grade intraepithelial neoplasia | 2 | 2 | — | — |  |  |  |  |  |  |
| Squamous cell carcinoma | 37 | 21 | 0.39 | 0.09, 1.68 | 0.206 |  |  |  |  |  |
| **Clinical TNM stage of SPC-PL** |  |  |  |  |  |  |  |  |  |  |
| 0-II | 27 | 13 | — | — |  | 27 | 13 | — | — |  |
| III-IVa | 12 | 10 | 2.80 | 1.18, 6.65 | 0.020 | 12 | 10 | 3.66 | 1.39, 9.62 | 0.009 |
|  | | | | | | | | | | |

**Table S5**

**Sensitivity analysis excluding patients with high-grade intraepithelial neoplasia (HGIN).**

Comparison of key clinical outcomes between the overall cohort and the cohort excluding HGIN cases. CR, complete response; OS, overall survival; PFS, progression-free survival; CI, confidence interval.

| **Outcome** | **Overall cohort (n=21)** | **Excluding HGIN (n=19)** |
| --- | --- | --- |
| **SPC-PL clinical CR rate** | 71.4% (15/21) | 68.4% (13/19) |
| **ESCC clinical CR rate** | 19.0% (4/21) | 21.1% (4/19) |
| **ESCC pathological CR rate*** | 38.5% (5/13) | 41.7% (5/12) |
| **2-year OS** | 75.9% (95% CI: 59.5%-96.8%) | 78.6% (95% CI: 62.0%-99.6%) |
| **2-year PFS** | 44.1% (95% CI: 26.2%-74.2%) | 51.5% (95% CI: 32.9%-80.5%) |

*Calculated among patients who underwent esophagectomy.

Values are presented as percentages with corresponding numerators and denominators where applicable.

Due to the limited sample size, no formal statistical comparisons were performed.

# Abbreviation list

| Abbreviation | Full Name |
| --- | --- |
| ESCC | esophageal squamous cell carcinoma |
| HNSCC | head and neck squamous cell carcinoma |
| SPC-PL | synchronous primary cancers in the pharynx and larynx |
| nICT | neoadjuvant immuno-chemotherapy |
| EGD | esophagogastroduodenoscopy |
| HGIN | high-grade intraepithelial neoplasia |
| AJCC | American Joint Committee on Cancer |
| CT | computed tomography |
| PET-CT | positron emission tomography–computed tomography |
| PFS | progression-free survival |
| PD-1 | programmed death-1 |
| CR | complete response |
| TRG | tumor regression grade |
| ESD | endoscopic submucosal dissection |
| CI | confidence interval |
| dCRT | definitive concurrent chemoradiotherapy |
| ICT | immuno-chemotherapy |
| SCC | squamous cell carcinoma |
| SUVmax | maximum standardized uptake value |
| HR | hazard ratio |
| NA | not applicable |
